# Supplementary material for: Analysis and modeling of cancer drug responses using cell cycle phase-specific rate effects
Source: PubMed Central journal article supplement (PMC10257663; doi:10.1038/s41467-023-39122-z), 2023-06-10
Supplement: 41467_2023_39122_MOESM1_ESM.pdf [file 41467_2023_39122_MOESM1_ESM.pdf]

# Analysis and modeling of cancer drug responses using cell cycle phase-specific rate effects

## Supplementary Information

Sean M. Gross<sup>1,†</sup>, Farnaz Mohammadi<sup>2,†</sup>, Crystal Sanchez-Aguila<sup>1</sup>, Paulina J. Zhan<sup>1</sup>, Tiera A. Liby<sup>1</sup>, Mark A. Dane<sup>1</sup>, Aaron S. Meyer<sup>2,^</sup>, and Laura M. Heiser<sup>1,^,\*</sup>

<sup>1</sup>Department of Biomedical Engineering, Knight Cancer Institute, Oregon Health & Science University, Portland, OR

<sup>2</sup>Department of Bioengineering, University of California, Los Angeles; Jonsson Comprehensive Cancer Center, University of California at Los Angeles, Los Angeles, CA

<sup>†</sup>These authors contributed equally

<sup>^</sup>These authors jointly supervised this work

## Supp. Figure 1

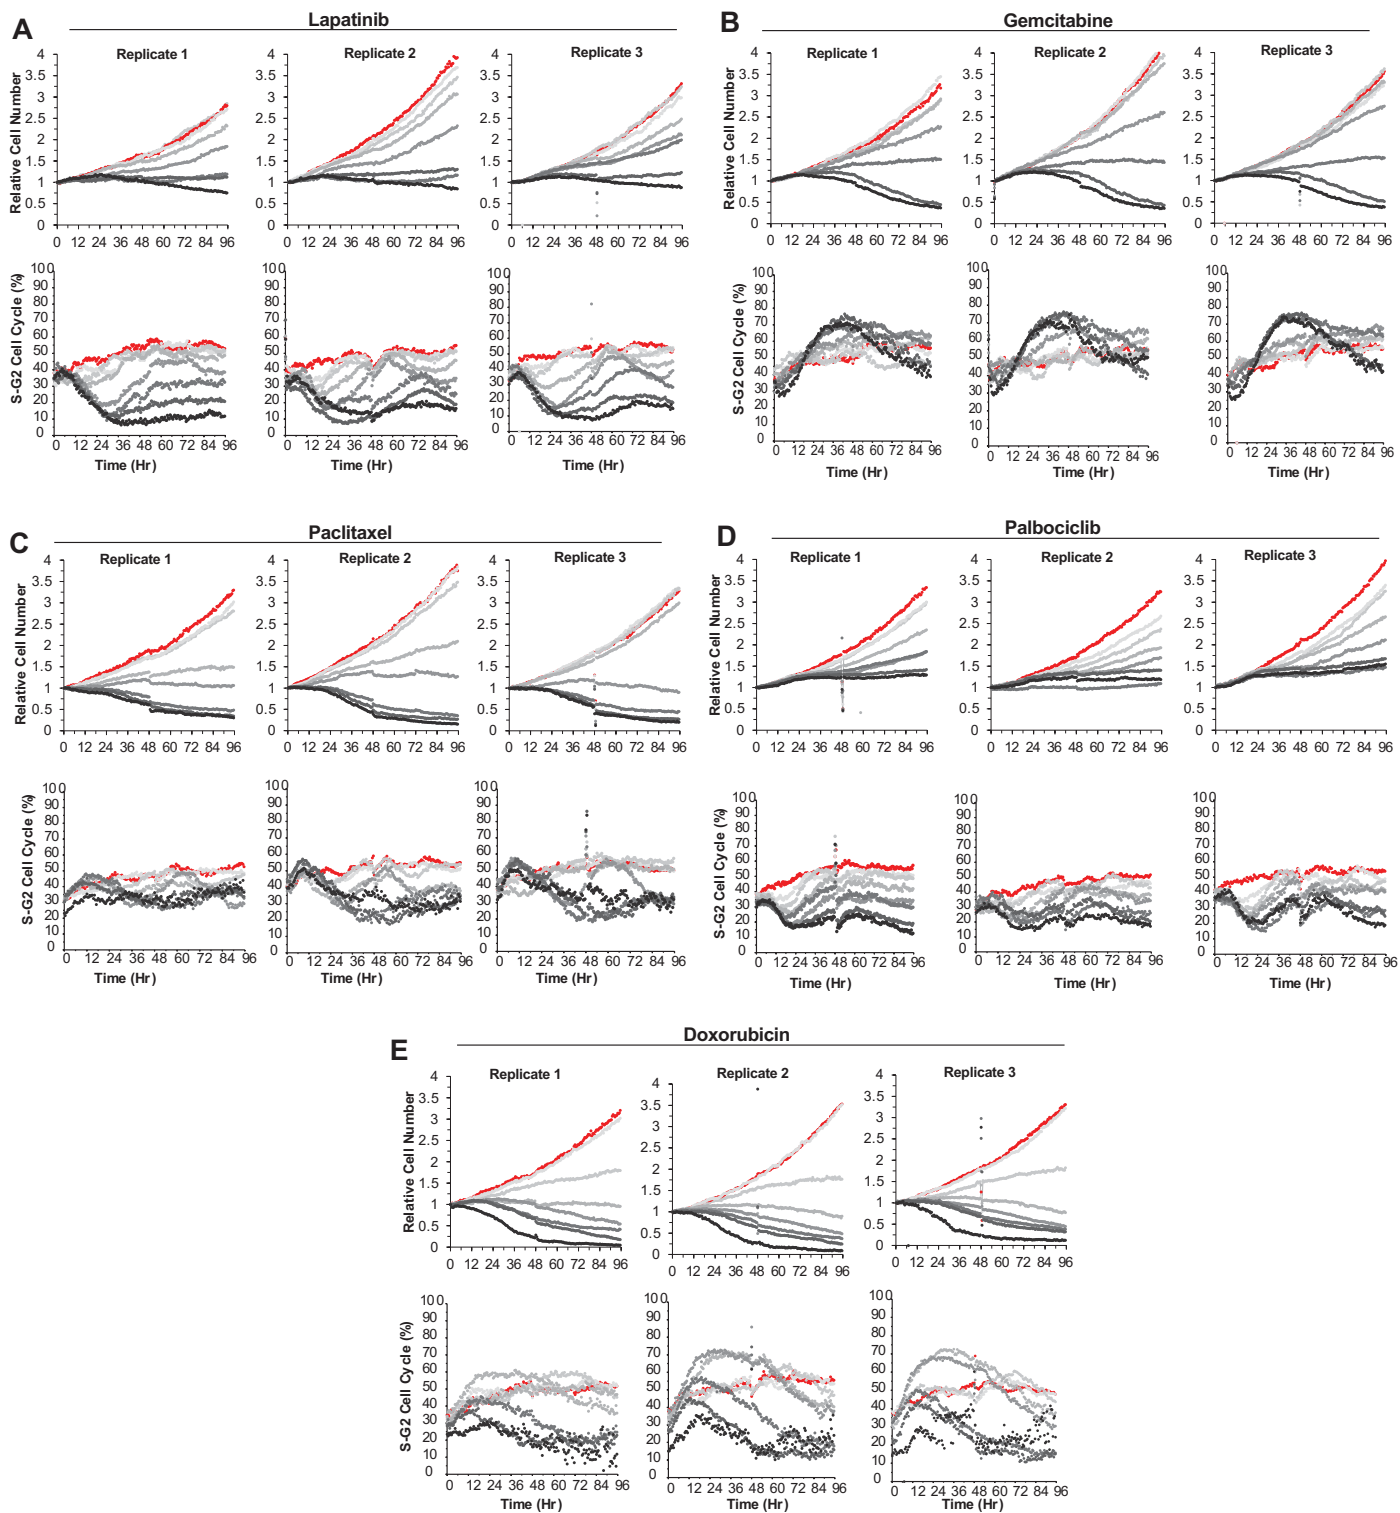

**Supplementary Figure 1. Individual replicates for AU565 drug responses show similar temporal dynamics and drug-induced changes to cell cycle.** Panels show relative cell numbers and S-G<sub>2</sub> normalized cell numbers for lapatinib (A), gemcitabine (B), paclitaxel (C), palbociclib (D), and doxorubicin (E) treatments for three biological replicates. Five drug concentrations (gray lines) and untreated control (red line) are plotted. Source data are provided on Synapse..

## Supp. Figure 2

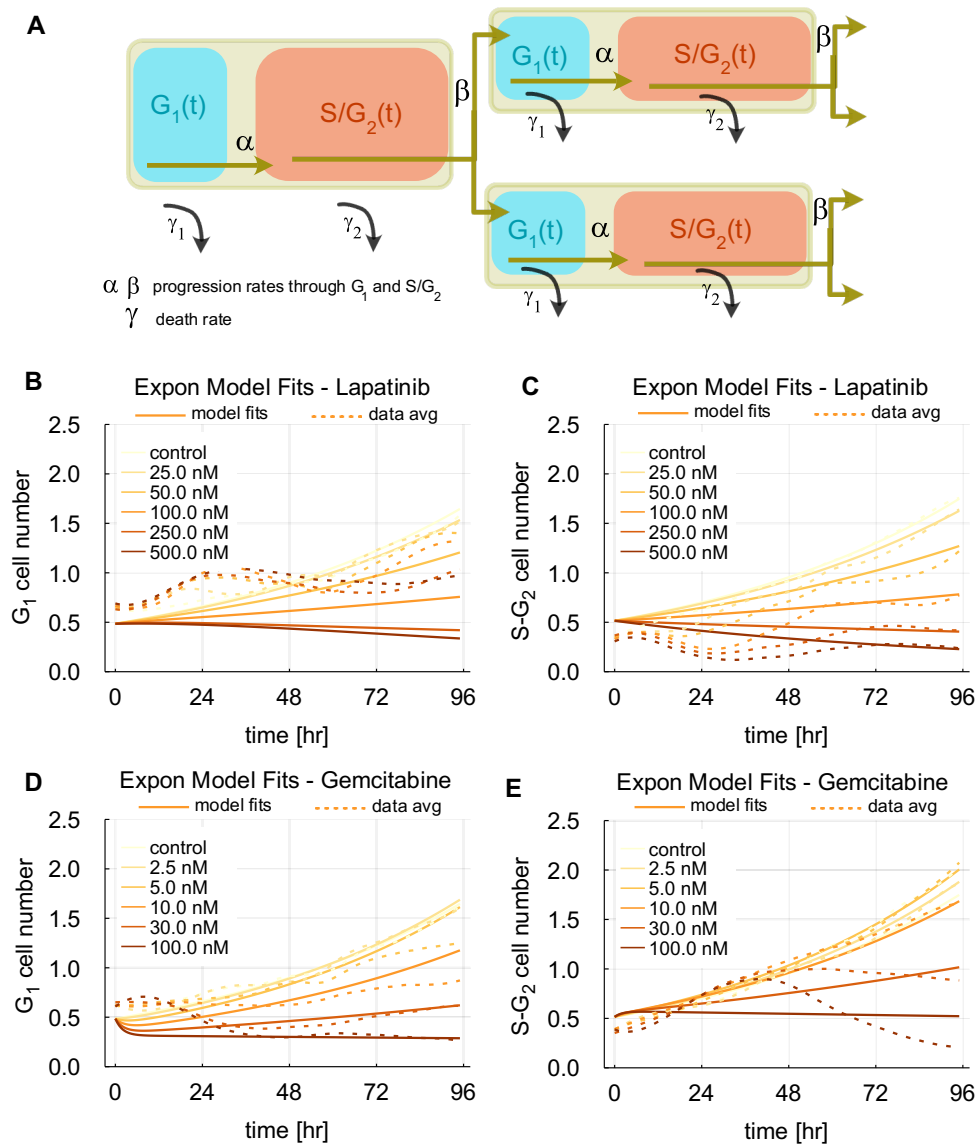

**Supplementary Figure 2. An exponential cell cycle model without incorporating delay times fails to capture the dynamics of drug response.** **A.** The transition diagram for a simple dynamical model with 2 phases ( $G_1$  and  $S-G_2$ ) and without the LCT.  $\alpha$  and  $\beta$ , are the transition rates from  $G_1$  to  $S-G_2$  and vice versa,  $\gamma_1$  and  $\gamma_2$  are the death rates in  $G_1$  and  $S-G_2$ , respectively. **B-E.** Exponential cell cycle model simulations of  $G_1$  and  $S-G_2$  cell numbers over time for control and 5 concentrations of lapatinib (**B-C**) and gemcitabine (**D-E**) (solid lines), respectively, overlaid with the average of three experimental replicates (dashed lines). Source data are provided on Synapse.

## Supp Figure 3

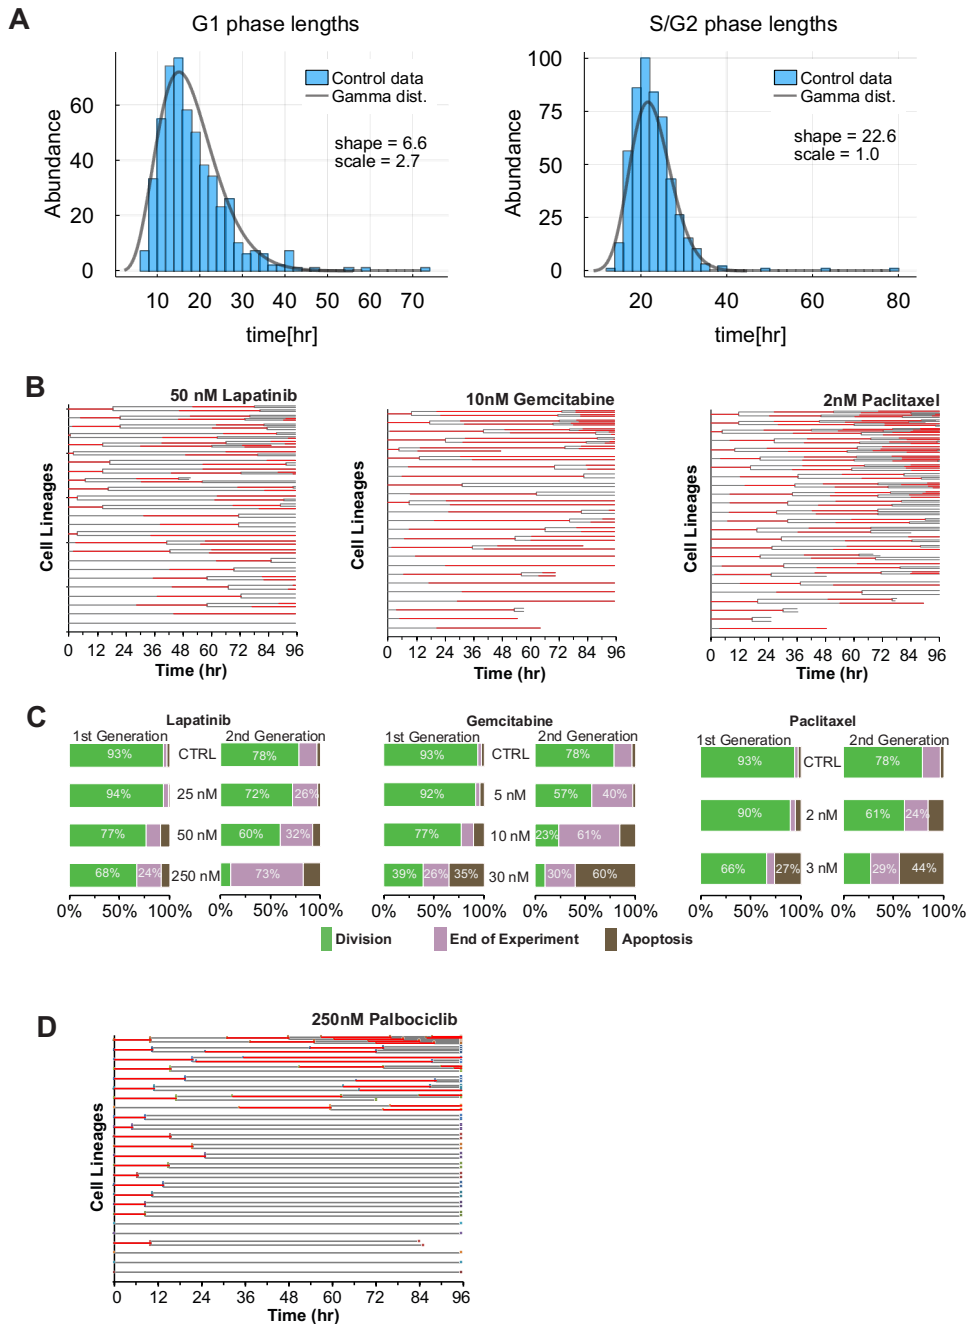

**Supplementary Figure 3. Analysis of single cell tracking data reveals drug-specific cell cycle phase effects in AU565 cells.** **A.** Lineage trees of 25 lineages across 96H for various drug treatments. Tracks are colored coded based on cell cycle phase: gray indicates G<sub>1</sub> and red indicates S-G<sub>2</sub> phase. Track splitting indicates mitosis, and track ending prior to 96H corresponds to apoptosis. **B.** Quantification of cell outcomes (division, cell death, viable at end of experiment) for cells from the first and second generations treated with lapatinib, gemcitabine, or paclitaxel. **C.** Gamma distribution of G<sub>1</sub> and S-G<sub>2</sub> phase durations for cells in control condition with sample size of 520 and 514 for G<sub>1</sub> and S-G<sub>2</sub> phases, respectively. **D.** Lineage trees for 25 lineages across 96H after treatment with Palbociclib. Source data are provided on Synapse.

## Supp. Figure 4

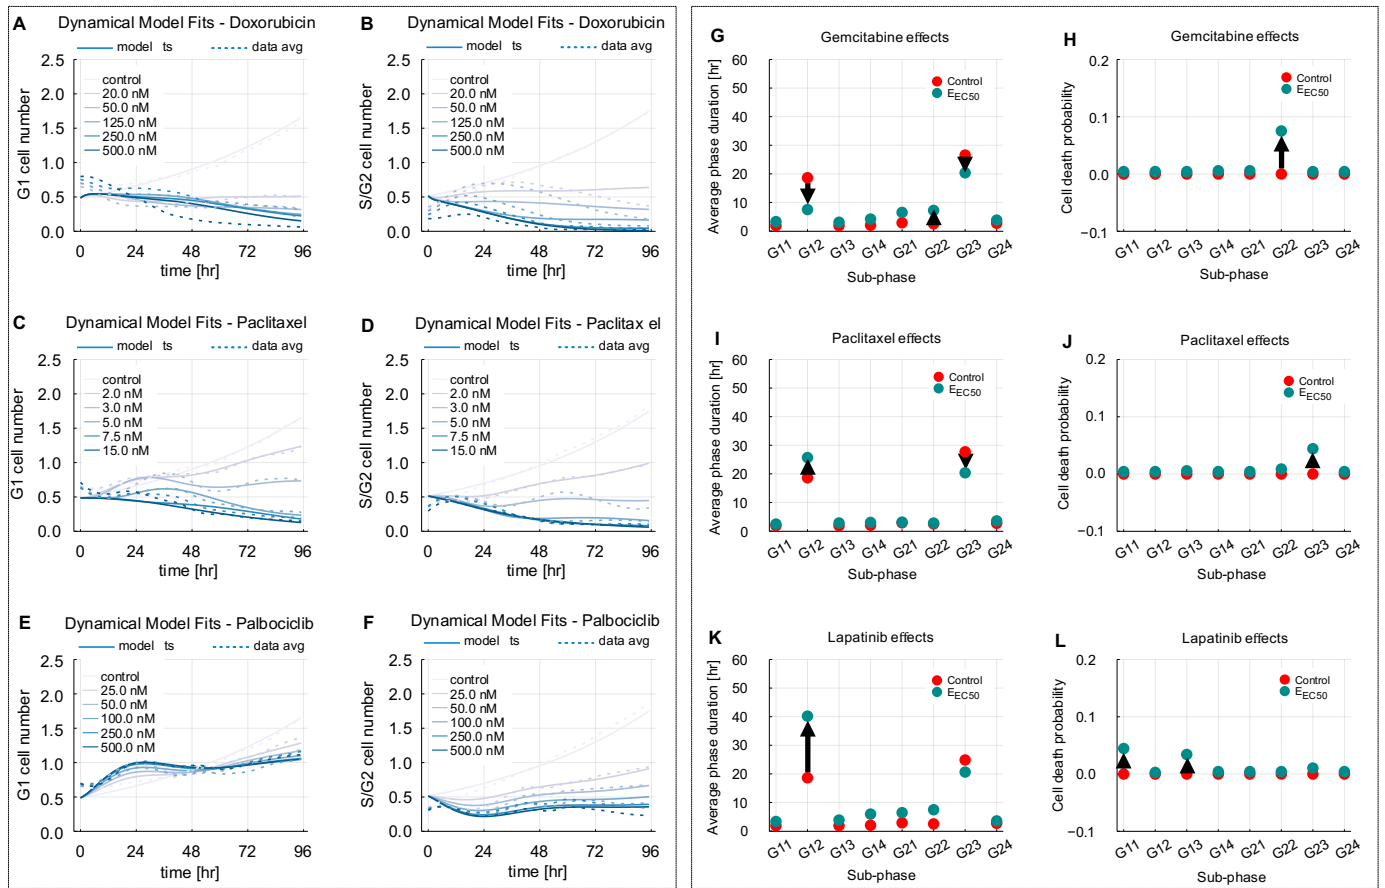

**Supplementary Figure 4. A dynamical model of the cell cycle captures the dynamics of drug response.** **A-F.** G<sub>1</sub> and S-G<sub>2</sub> cell numbers overtime, respectively, for the control and treatment at 5 concentrations (solid lines) for doxorubicin (**A-B**) paclitaxel (**C-D**), and palbociclib (**E-F**) overlaid with the average of three corresponding experimental replicates (dashed lines). **G-L.** The average phase durations in G<sub>1</sub> and S-G<sub>2</sub> phases for selected drug treatments. The arrow shows the shift from the control condition to the drug effect at the half maximum concentration (E<sub>EC50</sub>). Source data are provided on Synapse.

## Supp. Figure 5

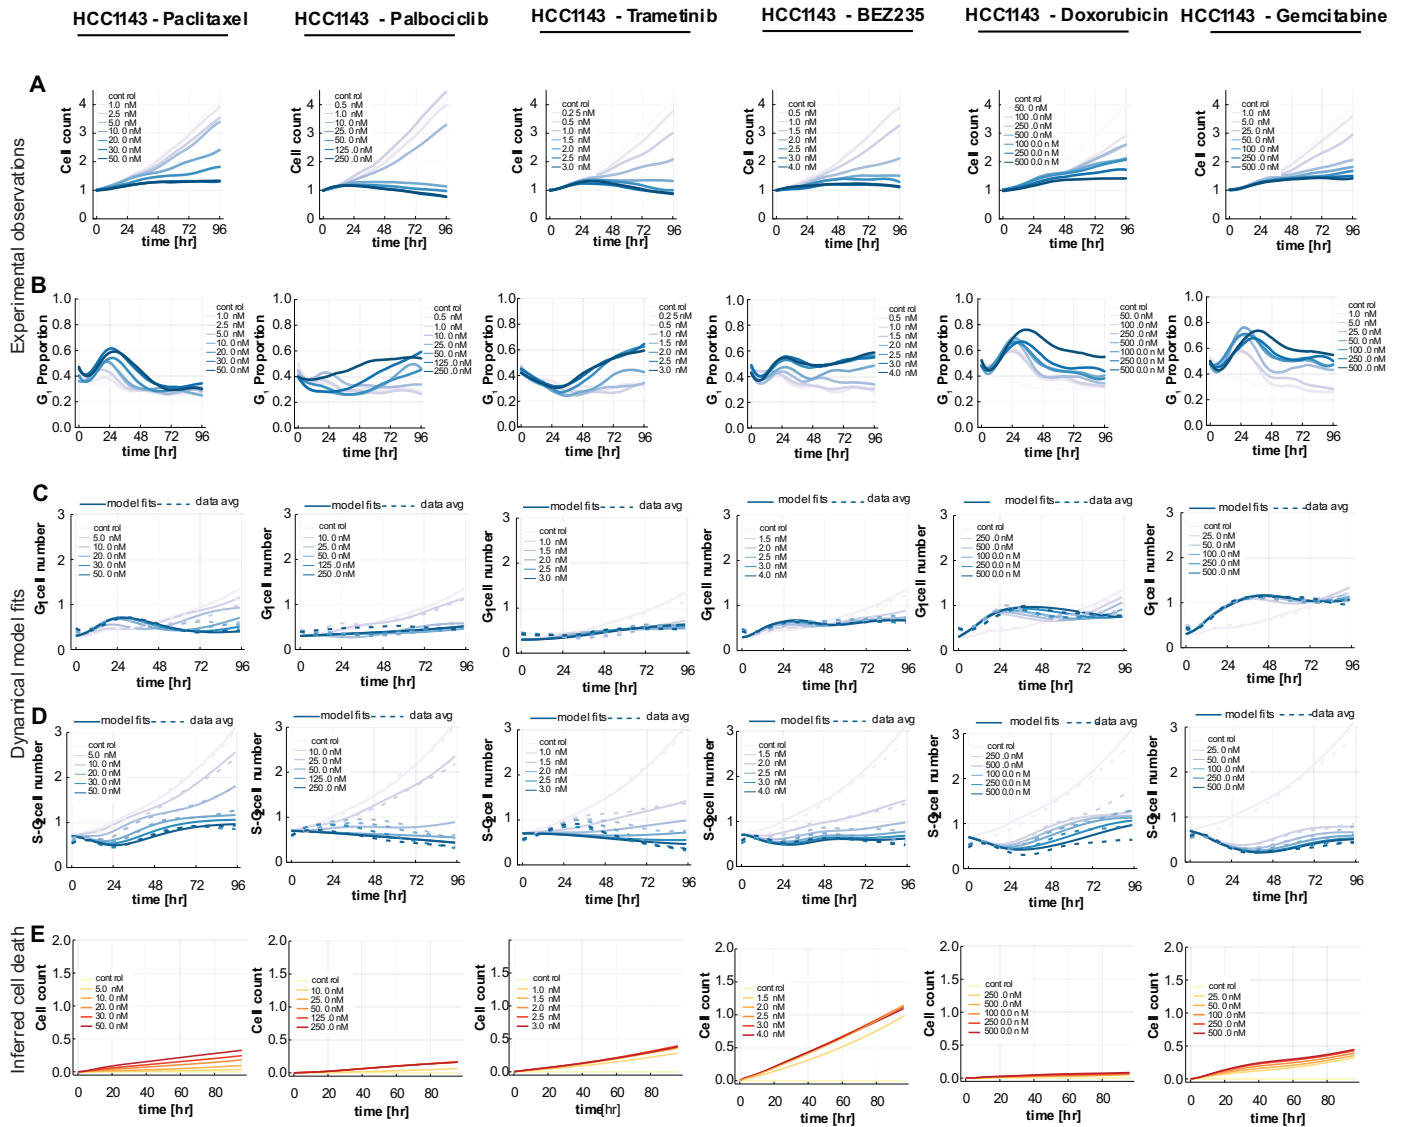

**Supplementary Figure 5. The introduced dynamical model captures the cell cycle dynamics of drug response in TNBC cell line HCC1143. A, B.** Experimentally observed drug-induced changes to cell numbers (A) and G<sub>1</sub> cell cycle phase proportion (B) after dose-escalation treatment with a panel of inhibitors. **C, D.** G<sub>1</sub> and S-G<sub>2</sub> fits overtime, respectively, for the untreated and treatment at 5 concentrations (solid lines) overlaid with the average of three corresponding experimental replicates (dashed lines) for 6 drug treatments. **E.** Inferred accumulated dead cells over time for 6 drug treatments. Source data are provided on Synapse.

# Supp. Figure 6

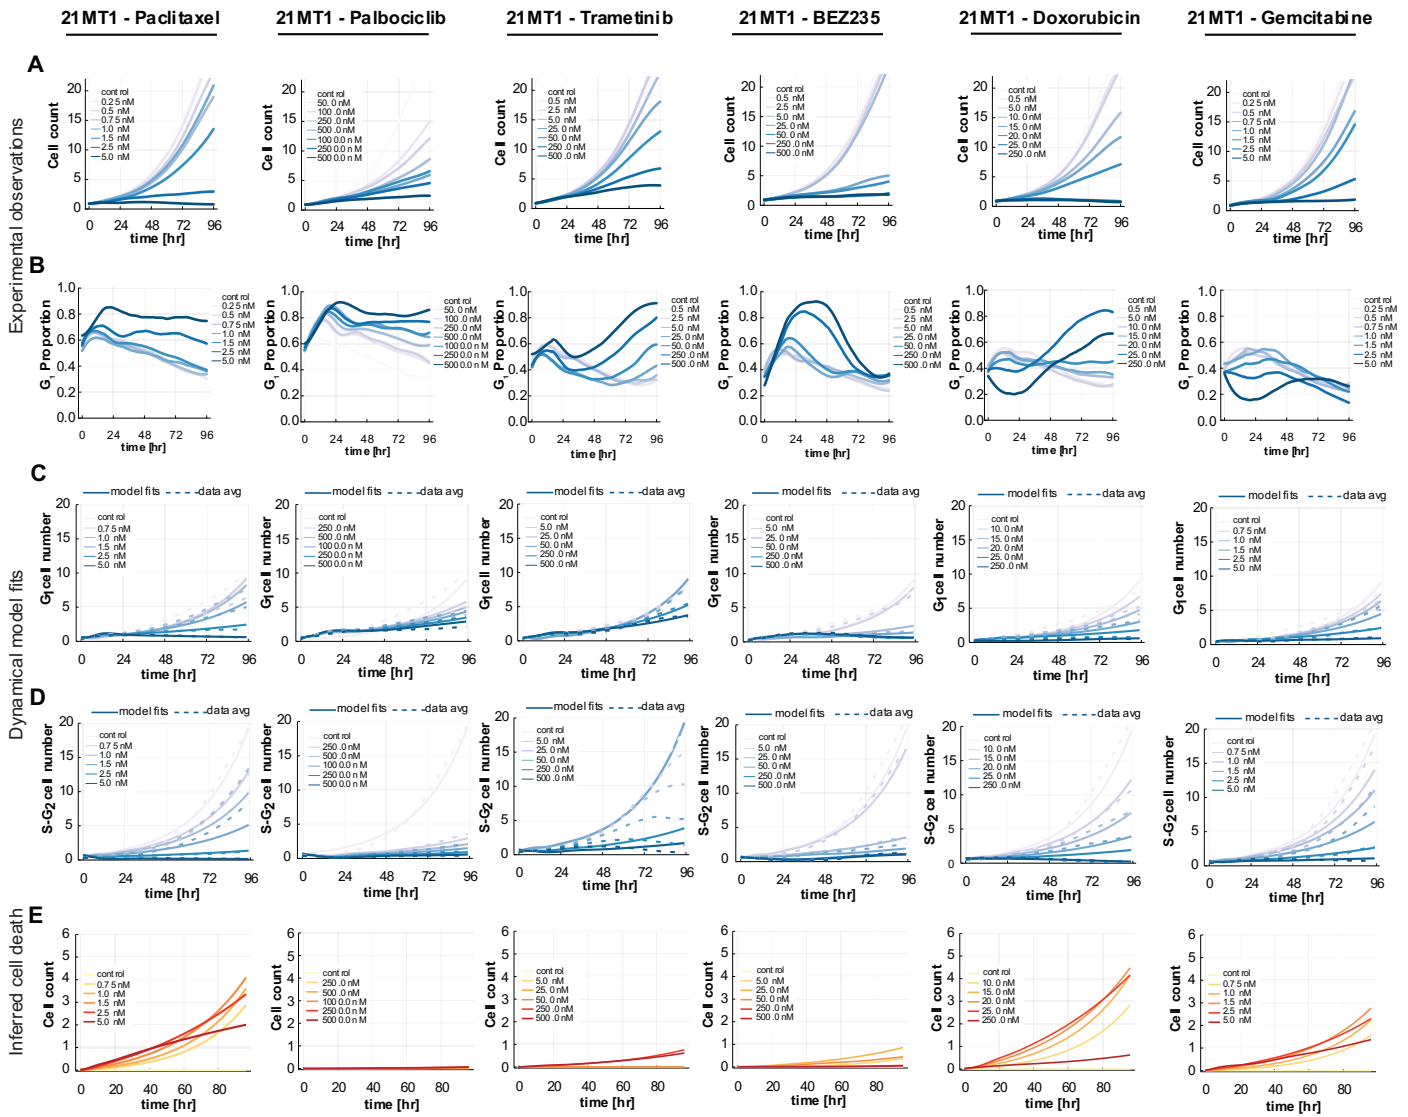

**Supplementary Figure 6. The introduced dynamical model captures the cell cycle dynamics of drug response in 21MT1 cell line. A, B.** Experimentally observed drug-induced changes to cell numbers (A) and G<sub>1</sub> cell cycle phase proportion (B) after dose-escalation treatment with a panel of inhibitors. **C, D.** G<sub>1</sub> and S-G<sub>2</sub> fits overtime, respectively, for the untreated and treatment at 5 concentrations (solid lines) overlaid with the average of three corresponding experimental replicates (dashed lines) for 6 drug treatments. **E.** Inferred accumulated dead cells over time for 6 drug treatments. Source data are provided on Synapse.

## Supp. Figure 7

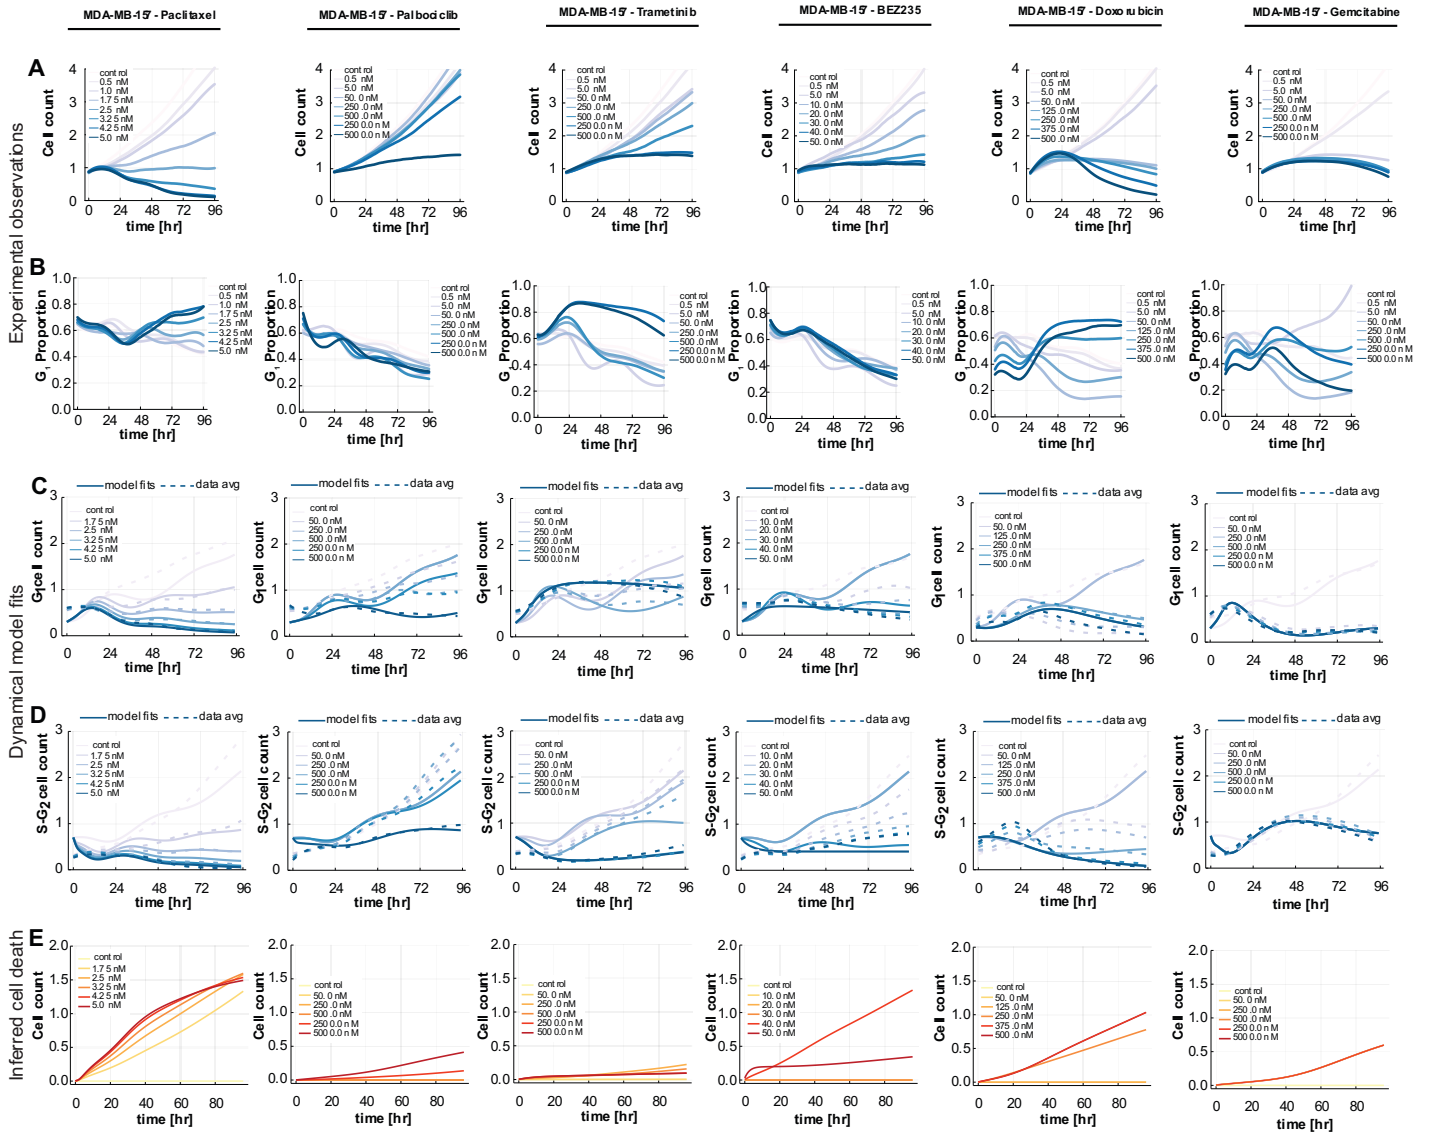

**Supplementary Figure 7.** The introduced dynamical model captures the cell cycle dynamics of drug response in TNBC cell line MDAMB175. **A,B.** Experimentally observed drug-induced changes to cell numbers (**A**) and G<sub>1</sub> cell cycle phase proportion (**B**) after dose-escalation treatment with a panel of inhibitors. **C,D.** G<sub>1</sub> and S-G<sub>2</sub> fits overtime, respectively, for the untreated and treatment at 5 concentrations (solid lines) overlaid with the average of three corresponding experimental replicates (dashed lines) for 6 drug treatments. **E.** Inferred accumulated dead cells over time for 6 drug treatments. Source data are provided on Synapse.



## Supp. Figure 8

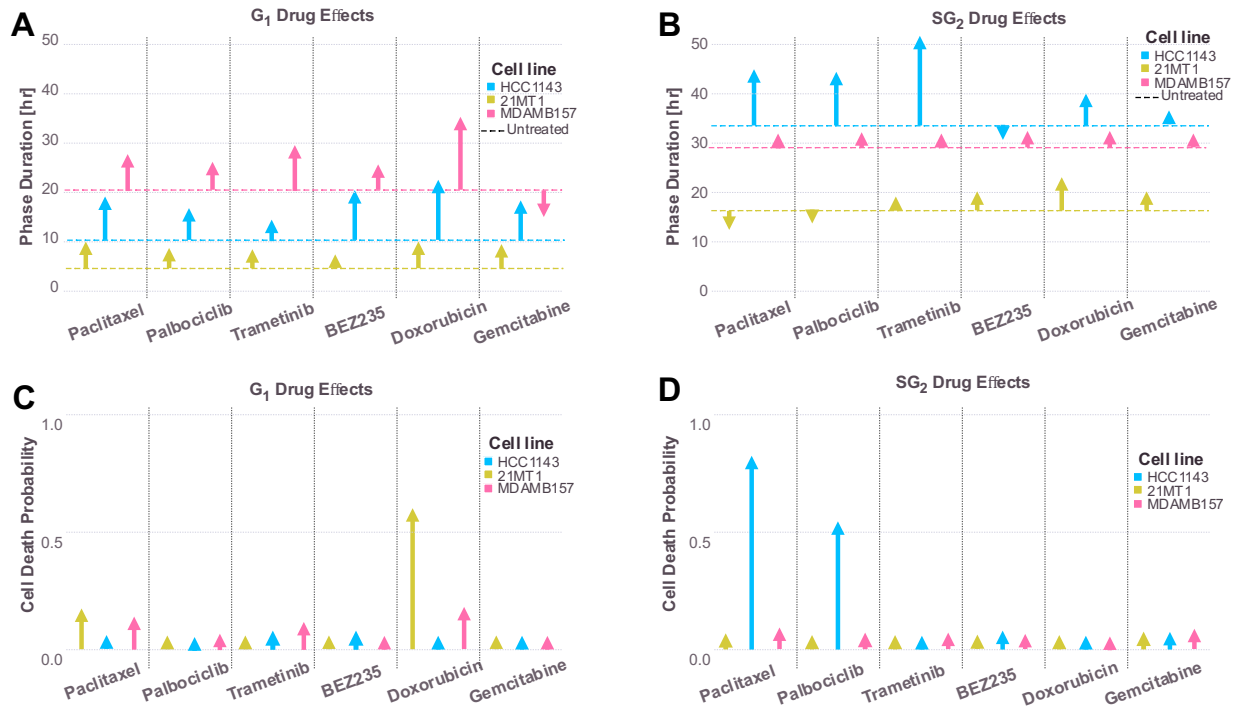

**Supplementary Figure 8. Summary of inferred cell cycle drug effects at half maximum concentration compared to untreated. A-B.** The average phase durations in G<sub>1</sub> (A) and S-G<sub>2</sub> (B) phases for HCC1143 (blue), 21MT1 (olive) and MDA-MB-157 (pink) treated with paclitaxel, palbociclib, trametinib, BEZ235, doxorubicin, and gemcitabine. The dashed lines show the average phase duration at untreated for each cell line. **C-D.** The cell death probability in G<sub>1</sub> (C) and S-G<sub>2</sub> (D) phases for HCC1143 (blue), 21MT1 (olive) and MDA-MB-157 (pink) treated with the same panel of drugs. The arrows show the quantity of increase or decrease in the effects from untreated to the half maximal concentration ( $E_{EC50}$ ). Source data are provided on Synapse.

## Supplementary Tables

| Symbol        | Units     | Explanation                                                |
|---------------|-----------|------------------------------------------------------------|
| $\alpha_1$    | 1/cell/hr | Cells progression rate through the first quarter of G1.    |
| $\alpha_2$    | 1/cell/hr | Cells progression rate through the second quarter of G1.   |
| $\alpha_3$    | 1/cell/hr | Cells progression rate through the third quarter of G1.    |
| $\alpha_4$    | 1/cell/hr | Cells progression rate through the fourth quarter of G1.   |
| $\beta_1$     | 1/cell/hr | Cells progression rate through the first quarter of S/G2.  |
| $\beta_2$     | 1/cell/hr | Cells progression rate through the second quarter of S/G2. |
| $\beta_3$     | 1/cell/hr | Cells progression rate through the third quarter of S/G2.  |
| $\beta_4$     | 1/cell/hr | Cells progression rate through the fourth quarter of S/G2. |
| $\gamma_{11}$ | 1/cell/hr | Cells rate of death within the first quarter of G1.        |
| $\gamma_{12}$ | 1/cell/hr | Cells rate of death within the second quarter of G1.       |
| $\gamma_{13}$ | 1/cell/hr | Cells rate of death within the third quarter of G1.        |
| $\gamma_{14}$ | 1/cell/hr | Cells rate of death within the fourth quarter of G1.       |
| $\gamma_{21}$ | 1/cell/hr | Cells rate of death within the first quarter of S/G2.      |
| $\gamma_{22}$ | 1/cell/hr | Cells rate of death within the second quarter of S/G2.     |
| $\gamma_{23}$ | 1/cell/hr | Cells rate of death within the third quarter of S/G2.      |
| $\gamma_{24}$ | 1/cell/hr | Cells rate of death within the fourth quarter of S/G2.     |

**Supplementary Table 1.** Explanation of the rate parameters within the ODE model.

| Cell line | Drug        | EC50 concentration [nM] |
|-----------|-------------|-------------------------|
| HCC1143   | Paclitaxel  | 1.46                    |
| HCC1143   | Palbociclib | 86.46                   |
| HCC1143   | Trametinib  | 3.71                    |
| HCC1143   | BEZ235      | 34.94                   |
| HCC1143   | Doxorubicin | 159.16                  |
| HCC1143   | Gemcitabine | 0.74                    |
| 21MT1     | Paclitaxel  | 1.55                    |
| 21MT1     | Palbociclib | 19.1                    |
| 21MT1     | Trametinib  | 220.8                   |
| 21MT1     | BEZ235      | 12.52                   |
| 21MT1     | Doxorubicin | 51.68                   |
| 21MT1     | Gemcitabine | 1.51                    |
| MDAMB157  | Paclitaxel  | 2.01                    |
| MDAMB157  | Palbociclib | 3594.01                 |
| MDAMB157  | Trametinib  | 658.20                  |
| MDAMB157  | BEZ235      | 10.90                   |
| MDAMB157  | Doxorubicin | 247.58                  |
| MDAMB157  | Gemcitabine | 0.64                    |

**Supplementary Table 2.** The concentration at half maximal effect for each cell line and treatment.
